# Supplementary material for: Fighting the hidden pandemic of antimicrobial resistance in paediatrics: recommendations from the International Pediatric Association
Source: PubMed Central journal article supplement — BMJ Paediatr Open. 2023 Jul 27;7(1):e002084. doi: 10.1136/bmjpo-2023-002084 (PMC10387713; doi:10.1136/bmjpo-2023-002084), 2023-07-27
Supplement: bmjpo-2023-002084.draft_revisions.pdf [file bmjpo-2023-002084.draft_revisions.pdf]

# BMJ Paediatrics Open

BMJ Paediatrics Open is committed to open peer review. As part of this commitment we make the peer review history of every article we publish publicly available.

When an article is published we post the peer reviewers' comments and the authors' responses online. We also post the versions of the paper that were used during peer review. These are the versions that the peer review comments apply to.

The versions of the paper that follow are the versions that were submitted during the peer review process. They are not the versions of record or the final published versions. They should not be cited or distributed as the published version of this manuscript.

BMJ Paediatrics Open is an open access journal and the full, final, typeset and author-corrected version of record of the manuscript is available on our site with no access controls, subscription charges or pay-per-view fees (<http://bmjpaedsopen.bmj.com>).

If you have any questions on BMJ Paediatrics Open's open peer review process please email [info.bmjpo@bmj.com](mailto:info.bmjpo@bmj.com)

# BMJ Paediatrics Open

## Fighting the hidden pandemic of antimicrobial resistance in pediatrics: An Update and the International Pediatric Association recommendations "The IPA position paper"

|                               |                                                                                                                                                                                                                                                                                                                                                                                                                                                                                                                                                                                                                                                                                                                                                                                                                                                                                                                                                                                                                                                                                                          |
|-------------------------------|----------------------------------------------------------------------------------------------------------------------------------------------------------------------------------------------------------------------------------------------------------------------------------------------------------------------------------------------------------------------------------------------------------------------------------------------------------------------------------------------------------------------------------------------------------------------------------------------------------------------------------------------------------------------------------------------------------------------------------------------------------------------------------------------------------------------------------------------------------------------------------------------------------------------------------------------------------------------------------------------------------------------------------------------------------------------------------------------------------|
| Journal:                      | <i>BMJ Paediatrics Open</i>                                                                                                                                                                                                                                                                                                                                                                                                                                                                                                                                                                                                                                                                                                                                                                                                                                                                                                                                                                                                                                                                              |
| Manuscript ID                 | bmjpo-2023-002084                                                                                                                                                                                                                                                                                                                                                                                                                                                                                                                                                                                                                                                                                                                                                                                                                                                                                                                                                                                                                                                                                        |
| Article Type:                 | Viewpoint                                                                                                                                                                                                                                                                                                                                                                                                                                                                                                                                                                                                                                                                                                                                                                                                                                                                                                                                                                                                                                                                                                |
| Date Submitted by the Author: | 21-May-2023                                                                                                                                                                                                                                                                                                                                                                                                                                                                                                                                                                                                                                                                                                                                                                                                                                                                                                                                                                                                                                                                                              |
| Complete List of Authors:     | <p>Pana, Zoi; European University Cyprus, Medical School<br/> El-Shabrawi, Mortada; Cairo University, Cairo, Egypt, Department of Pediatrics<br/> Sultan, Muhammad Ashraf; Rawalpindi Medical University, Infectious Diseases; Home,<br/> Murray, Thomas; Yale School of Medicine, Connecticut, USA, Department of Pediatrics, Infectious Disease and Global Health and Department of Laboratory Medicine<br/> Alam, Anggraini; Universitas Padjadjaran, Bandung, Indonesia, Medical School<br/> Yewale, Vijay; Apollo Hospitals, Navi Mumbai, India., Institute of Child Health<br/> Dharmapalan, Dhanya ; Apollo Hospitals, Navi Mumbai., Institute of Child Health<br/> Klein, Jonathan ; University of Illinois at Chicago; Chicago, IL, USA, Department of Pediatrics<br/> Haddad, Joseph; Saint George Hospital University Medical Center<br/> Thacker, Naveen; Deep Children Hospital and Research Centre, Gandhidham Kutch Gujarat India<br/> Pulungan, Aman; Department of Child Health, Faculty of Medicine, University of Indonesia<br/> Hadjipanayis, Adamos; European University Cyprus</p> |
| Keywords:                     | Pharmacology, Epidemiology                                                                                                                                                                                                                                                                                                                                                                                                                                                                                                                                                                                                                                                                                                                                                                                                                                                                                                                                                                                                                                                                               |
|                               |                                                                                                                                                                                                                                                                                                                                                                                                                                                                                                                                                                                                                                                                                                                                                                                                                                                                                                                                                                                                                                                                                                          |

SCHOLARONE™  
Manuscripts

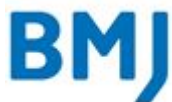

I, the Submitting Author has the right to grant and does grant on behalf of all authors of the Work (as defined in the below author licence), an exclusive licence and/or a non-exclusive licence for contributions from authors who are: i) UK Crown employees; ii) where BMJ has agreed a CC-BY licence shall apply, and/or iii) in accordance with the terms applicable for US Federal Government officers or employees acting as part of their official duties; on a worldwide, perpetual, irrevocable, royalty-free basis to BMJ Publishing Group Ltd ("BMJ") its licensees and where the relevant Journal is co-owned by BMJ to the co-owners of the Journal, to publish the Work in this journal and any other BMJ products and to exploit all rights, as set out in our [licence](#).

The Submitting Author accepts and understands that any supply made under these terms is made by BMJ to the Submitting Author unless you are acting as an employee on behalf of your employer or a postgraduate student of an affiliated institution which is paying any applicable article publishing charge ("APC") for Open Access articles. Where the Submitting Author wishes to make the Work available on an Open Access basis (and intends to pay the relevant APC), the terms of reuse of such Open Access shall be governed by a Creative Commons licence – details of these licences and which [Creative Commons](#) licence will apply to this Work are set out in our licence referred to above.

Other than as permitted in any relevant BMJ Author's Self Archiving Policies, I confirm this Work has not been accepted for publication elsewhere, is not being considered for publication elsewhere and does not duplicate material already published. I confirm all authors consent to publication of this Work and authorise the granting of this licence.

## VIEWPOINT

### Position Report from the International Pediatric Association

### Fighting the hidden pandemic of antimicrobial resistance in pediatrics: An Update and the International Pediatric Association recommendations

Zoi Dorothea Pana ZD<sup>1</sup>, Mortada El-Shabrawi<sup>2</sup>, Sultan, Muhammad Ashraf Sultan<sup>3</sup>, Thomas Murray T<sup>4</sup>, Anggraini Alam<sup>5</sup>, Yewale Vijay<sup>6</sup>, Dhanya Dharmapalan<sup>7</sup>, Jonathan D. Klein<sup>8</sup>, Joseph Haddad<sup>9</sup>, Naveen Thacker<sup>10</sup>, Aman B Pulungan<sup>11</sup>, Adamos Hadjipanayis<sup>12</sup>

1. Medical School, European University of Cyprus (EUC), Nicosia, Cyprus.
2. Department of Pediatrics, Cairo University, Cairo, Egypt. Standing Committee Member of the IPA (2019-2023), Co-Chair of the IPA Strategic Advisory Group on: COVID-19, Antimicrobial Resistance, and Infectious Diseases, President of the International Society of Tropical Pediatrics (ISTP)
3. Member, Standing Committee International Pediatric Association (IPA), Member, Standing Committee Asia Pacific Pediatric Association (APPA), Editor in Chief, Asia Pacific Journal of Pediatrics and Child Health, Member NITAG EPI Pakistan, Co-Chair of the IPA Strategic Advisory Group on: COVID-19, Antimicrobial Resistance, and Infectious Diseases
4. Department of Pediatrics, Infectious Disease and Global Health and Department of Laboratory Medicine, Yale School of Medicine, Connecticut, USA. Member of the IPA Strategic Advisory Group on: COVID-19, Antimicrobial Resistance, and Infectious Diseases
5. Medical School, Universitas Padjadjaran, Bandung, Indonesia, Member of the IPA Strategic Advisory Group on: COVID-19, Antimicrobial Resistance, and Infectious Diseases
6. Institute of Child Health, Apollo Hospitals, Navi Mumbai, India. Local Indian Coordinator the IPA Strategic Advisory Group on: COVID-19, Antimicrobial Resistance, and Infectious Diseases
7. Institute of Child Health, Apollo Hospitals, Navi Mumbai. IPA Strategic Advisory Group on: COVID-19, Antimicrobial Resistance, and Infectious Diseases
8. Department of Pediatrics University of Illinois at Chicago, Illinois, United States. International Pediatric Association.
9. Professor in Pediatrics and Neonatology, President of the Union of Arab Pediatric Societies (UAPS) (2017-2022), President of Union of Mediterranean and Middle East Pediatric Societies (UMEMPS) (2013-2017), President of the Lebanese Pediatric Society (2012-2014, 2018-2020), President Elect IPA
10. MD Ped. \*President International Pediatrics Association \*\* Director, Deep Children Hospital and Research Centre, Plot 208, Sector 1 -A Gandhidham Kutch Gujarat, India
11. Department of Child Health, Faculty of Medicine, University of Indonesia, Jakarta. Executive director of the IPA; Professor Pediatrics, Faculty of Medicine, Universitas Indonesia
12. Medical School, European University Cyprus, Nicosia, Cyprus, Scientific Coordinator of the IPA

**Corresponding author:** Zoi Dorothea Pana, MD, MSc, PhD, Medical School, European University of Cyprus EUC, Nicosia, Cyprus, email: z.pana@euc.ac.cy, phone: +35794049474

**Keywords:** antimicrobial resistance, AMR, antibiotic prescription, pediatrics, infection prevention, public health, IPA

**Conflict of interest:** None

**Word count:** 1178

Contributors: ZDP, M.E.S and A.H. drafted the manuscript, all authors reviewed and edited the manuscript.

Funding: none

Competing interests: none

Patient consent for publication Not applicable.

Provenance and peer review Commissioned; externally peer reviewed.

### 55 **The impact of antimicrobial resistance in pediatrics**

56 The “masked” or the “silent” pandemic of antimicrobial resistance (AMR) is one of the biggest emerging  
57 threats to global health. The global burden of resistant infections during the neonatal and pediatric period  
58 is currently alarming. According to a recent report, infections attributed to multi drug resistant (MDR)  
59 bacteria may account for up to 30% of the total cases<sup>1</sup>, while in specific areas, like in Middle East region,  
60 almost 90% of sepsis during the neonatal period in neonatal intensive care units (NICUs) were associated  
61 with resistant bacteria.<sup>2</sup> In the sub-Saharan Africa region, a recent meta- analysis in neonates showed that  
62 resistance to WHO recommended  $\beta$ -lactams was observed in 68%.<sup>3</sup> Several pediatric related issues have  
63 been identified, among others, the lack of pediatric antibiotic drug development, the limited pediatric  
64 clinical studies and therefore the lack of pediatric specific data, the limited drug options to treat MRD  
65 pediatric infections and finally the mis- or over-use of antibiotics. The 2016 ARPEC study reported a list  
66 of quality indicators to enhance the appropriate and prudent pediatric antimicrobial use.<sup>4</sup> The WHO report  
67 has identified for the first-time priorities for research and development of age-appropriate antibiotics in  
68 children. In response to the WHO global action plan to optimize the use of antimicrobial drugs both in  
69 adults and pediatrics, WHO has prepared and launched the updated WHO Model List of Essential  
70 Medicines (EML). The latter includes a pediatric section aiming to increase literacy and awareness related  
71 to the epidemiology, common infectious agents, diagnostic strategies and the impact of AMR. Most  
72 importantly, the EML-C includes guidance on antibiotic prescribing for the empiric treatment of common  
73 infections in children.

### 75 **The need to support initiatives related to infection control, infection prevention and antimicrobial 76 stewardship in pediatrics**

77 A concerted, massive global awareness campaign targeting all health care workers, the regulatory  
78 authorities as well as the public is urgently needed to combat this AMR pandemic. This is one face of the  
79 coin. The second face of the coin being another concerted, massive global campaign in expanding infection  
80 prevention strategies, including the vaccination coverage in both developed and developing countries. As  
81 a result of vaccination, antibiotic usage will reduce selection pressure that favors resistant organisms.  
82 One key aspect of AMR and hospital acquired infections (HAIs) associated with AMR is that through  
83 specific actions, these infections can be prevented (preventable harm and waste). It is estimated that up to  
84 60-70% of HAIs are considered avoidable through the improvement of infection prevention, infection  
85 control and antimicrobial stewardship multimodal strategies. Infections can be prevented by implementing  
86 a series of measures (known as bundles). The implementation of infection control and prevention strategies  
87 in pediatric health care remains worldwide a critical quality safety indicator that improves patient outcomes

1  
2  
3 88 and reduce preventable harm in children, such as the incidence of pediatric infections due to AMR in both  
4  
5 89 inpatient and outpatient settings.

6 90 Strict legislation and monitoring regarding the over-the-counter availability of antibiotics is also an  
7  
8 91 important infection control pillar in combatting AMR. Unfortunately, acquisition of antibiotics without  
9  
10 92 prescriptions is a global phenomenon. Even in Sweden, a country with very strong legislation and regulation  
11  
12 93 of antibiotics, a recent survey showed that 2.3% of the respondents had acquired antibiotics without  
13  
14 94 prescription.<sup>5</sup> This will require careful attention to access to healthcare so children who require antibiotics  
15  
16 95 can secure an appropriate drug at the correct dose for the ideal length of time after evaluation by a healthcare  
17  
18 96 provider.

19 97 Key components of pediatric infection prevention and control programs both at the national and local levels  
20  
21 98 are the establishment of staff education and training; use of evidence-based guidelines; surveillance,  
22  
23 99 monitoring, audit and feedback regarding antibiotic use in antimicrobial stewardship programs; workload  
24  
25 100 and staffing; and rigorous maintenance of environmental hygiene. Of importance, priorities should be  
26  
27 101 addressed both at a global and national level in governance, planning, regulatory and legal frameworks with  
28  
29 102 close coordination and collaboration among key stakeholders in the public and private sectors to decrease  
30  
31 103 the risk of AMR in pediatrics.

32 104 Another important aspect is the investment in the development of antiseptics and anti-infectives for the  
33  
34 105 pediatric population. A major barrier to effective antimicrobial therapy is shortages of key antibiotics (such  
35  
36 106 as amoxicillin). The supply of antibiotics must not be left to the market but requires additionally targeted  
37  
38 107 transnational support from governments, NGOs, and philanthropy. All new and existing drugs need  
39  
40 108 evidence-based dosage regimens from clinical studies for all age-groups (modelling and simulation will be  
41  
42 109 useful to supplement carefully designed clinical studies) and formulations that are appropriate for all age  
43  
44 110 groups in all climatic settings. Drug development of antibiotics in pediatrics should be driven by  
45  
46 111 pharmaceutical policy that ensures that children's needs are included in the development of novel  
47  
48 112 approaches such as the "subscription model".  
49  
50 113

#### 51 114 **Conclusion**

52 115  
53 116 The IPA workshop conducted by a group of multinational experts at the 30<sup>th</sup> Congress of the IPA in  
54  
55 117 Gandhinagar, Gujarat, India on February, 18<sup>th</sup>, 2023 is a an example of such campaigns, and many other  
56  
57 118 larger steps should follow in the coming few months or years, in order to end, or at least to halt, this masked  
58  
59 119 or silent AMR pandemic. The International Pediatric Association position against antimicrobial resistance  
60  
61 120 in pediatrics:  
62  
63 121

- 1  
2  
3 122 1. IPA recommends to the pediatricians and IPA member societies globally to use all indicators  
4 123 related with the prompt discontinuation or de-escalation of antibiotics according to microbial  
5 124 culture results, the early switch from broad spectrum empiric to narrower spectrum definitive  
6 125 antimicrobial therapy in children when possible.
- 7  
8 126 2. IPA recommends to the pharmaceutical industry to increase their efforts in development of new  
9 127 effective antimicrobial agents and to provide sufficient amounts of appropriate antibiotics in  
10 128 pediatric formulations (the current shortage frequently urges pediatricians to use inappropriate  
11 129 broad-spectrum treatment).
- 12 130 3. IPA recommends to the pediatricians and IPA member societies globally to perform the complete  
13 131 documentation for antibiotic prescription in the patient's medical charts.
- 14 132 4. IPA recommends to the pediatricians and IPA member societies globally that the choice of  
15 133 antibiotic, dose, route of administration and duration of treatment for common infectious  
16 134 syndromes in pediatrics should be in alignment with the recommendations for antibiotics included  
17 135 in the WHO Model List of Essential Medicines in children<sup>13</sup> and Essential Medicines for Children  
18 136 and the WHO AWaRe.
- 19 137 5. IPA recommends action by multiple stakeholders for rational pharmaceutical policy that addresses  
20 138 AMR. This needs to include reliable global supply of key antibiotics, development of dosage  
21 139 regimens and dosage forms that are appropriate for children, and the inclusion of paediatric-specific  
22 140 elements in incentives and drivers for the development of antifeactives.
- 23 141 6. IPA supports any initiative driven by any global or national agency that fosters public and  
24 142 healthcare provider awareness and literacy, prioritizing the need to advocate with local, national  
25 143 and international governments for legislation to reduce OTC antibiotics.
- 26 144 7. IPA supports the need for pediatric specific research and more accurate and accessible diagnostics  
27 145 to avoid antibiotic overuse.
- 28 146 8. IPA will collaborate together with global stakeholders, agencies and organizations to enhance  
29 147 public awareness and most importantly leverage high-level scientific and political engagement,  
30 148 financial resources and technical expertise, adapting to country-level needs and demands for  
31 149 tackling AMR with focus on the pediatric population.

150

151

152

153

154 **References**

- 155 1. Cassini A, Högberg LD, Plachouras D, et al. Attributable deaths and disability-adjusted life-years  
156 caused by infections with antibiotic-resistant bacteria in the EU and the European Economic Area  
157 in 2015: A population-level modelling analysis. *Lancet Infect Dis* 2019, 19, 56–66.
- 158 2. Al Jarousha AM, El Jadba AH, Al Afifi AS, et al. Nosocomial multidrug-resistant *Acinetobacter*  
159 *baumannii* in the neonatal intensive care unit in Gaza City, Palestine. *Int J Infect Dis* 2009, 13,  
160 623–628.
- 161 3. Okomo U, Akpalu ENK, Le Doare K, et al. Aetiology of invasive bacterial infection and  
162 antimicrobial resistance in neonates in sub-Saharan Africa: A systematic review and meta-analysis  
163 in line with the STROBE-NI reporting guidelines. *Lancet Infect Dis* 2019, 19, 1219–1234.
- 164 4. Versporten A, Bielicki J, Drapier N, Sharland M, Goossens H; ARPEC project group. *J Antimicrob*  
165 *Chemother* 2016 Apr;71(4):1106-17. doi: 10.1093/jac/dkv418.
- 166 5. Munthe C, Malmqvist E, Rönnerstrand B. Non-prescription acquisition of antibiotics: Prevalence,  
167 motives, pathways and explanatory factors in the Swedish population. *PLoS One*  
168 2022;17(9):e0273117.



# BMJ Paediatrics Open

## Fighting the hidden pandemic of antimicrobial resistance in pediatrics: recommendations from the International Pediatric Association

|                               |                                                                                                                                                                                                                                                                                                                                                                                                                                                                                                                                                                                                                                                                                                                                                                                                                                                                                                                                                                                                                                                                                                          |
|-------------------------------|----------------------------------------------------------------------------------------------------------------------------------------------------------------------------------------------------------------------------------------------------------------------------------------------------------------------------------------------------------------------------------------------------------------------------------------------------------------------------------------------------------------------------------------------------------------------------------------------------------------------------------------------------------------------------------------------------------------------------------------------------------------------------------------------------------------------------------------------------------------------------------------------------------------------------------------------------------------------------------------------------------------------------------------------------------------------------------------------------------|
| Journal:                      | <i>BMJ Paediatrics Open</i>                                                                                                                                                                                                                                                                                                                                                                                                                                                                                                                                                                                                                                                                                                                                                                                                                                                                                                                                                                                                                                                                              |
| Manuscript ID                 | bmjpo-2023-002084.R1                                                                                                                                                                                                                                                                                                                                                                                                                                                                                                                                                                                                                                                                                                                                                                                                                                                                                                                                                                                                                                                                                     |
| Article Type:                 | Viewpoint                                                                                                                                                                                                                                                                                                                                                                                                                                                                                                                                                                                                                                                                                                                                                                                                                                                                                                                                                                                                                                                                                                |
| Date Submitted by the Author: | 09-Jun-2023                                                                                                                                                                                                                                                                                                                                                                                                                                                                                                                                                                                                                                                                                                                                                                                                                                                                                                                                                                                                                                                                                              |
| Complete List of Authors:     | <p>Pana, Zoi; European University Cyprus, Medical School<br/> El-Shabrawi, Mortada; Cairo University, Cairo, Egypt, Department of Pediatrics<br/> Sultan, Muhammad Ashraf; Rawalpindi Medical University, Infectious Diseases; Home,<br/> Murray, Thomas; Yale School of Medicine, Connecticut, USA, Department of Pediatrics, Infectious Disease and Global Health and Department of Laboratory Medicine<br/> Alam, Anggraini; Universitas Padjadjaran, Bandung, Indonesia, Medical School<br/> Yewale, Vijay; Apollo Hospitals, Navi Mumbai, India., Institute of Child Health<br/> Dharmapalan, Dhanya ; Apollo Hospitals, Navi Mumbai., Institute of Child Health<br/> Klein, Jonathan ; University of Illinois at Chicago; Chicago, IL, USA, Department of Pediatrics<br/> Haddad, Joseph; Saint George Hospital University Medical Center<br/> Thacker, Naveen; Deep Children Hospital and Research Centre, Gandhidham Kutch Gujarat India<br/> Pulungan, Aman; Department of Child Health, Faculty of Medicine, University of Indonesia<br/> Hadjipanayis, Adamos; European University Cyprus</p> |
| Keywords:                     | Pharmacology, Epidemiology                                                                                                                                                                                                                                                                                                                                                                                                                                                                                                                                                                                                                                                                                                                                                                                                                                                                                                                                                                                                                                                                               |
|                               |                                                                                                                                                                                                                                                                                                                                                                                                                                                                                                                                                                                                                                                                                                                                                                                                                                                                                                                                                                                                                                                                                                          |

SCHOLARONE™  
Manuscripts



I, the Submitting Author has the right to grant and does grant on behalf of all authors of the Work (as defined in the below author licence), an exclusive licence and/or a non-exclusive licence for contributions from authors who are: i) UK Crown employees; ii) where BMJ has agreed a CC-BY licence shall apply, and/or iii) in accordance with the terms applicable for US Federal Government officers or employees acting as part of their official duties; on a worldwide, perpetual, irrevocable, royalty-free basis to BMJ Publishing Group Ltd ("BMJ") its licensees and where the relevant Journal is co-owned by BMJ to the co-owners of the Journal, to publish the Work in this journal and any other BMJ products and to exploit all rights, as set out in our [licence](#).

The Submitting Author accepts and understands that any supply made under these terms is made by BMJ to the Submitting Author unless you are acting as an employee on behalf of your employer or a postgraduate student of an affiliated institution which is paying any applicable article publishing charge ("APC") for Open Access articles. Where the Submitting Author wishes to make the Work available on an Open Access basis (and intends to pay the relevant APC), the terms of reuse of such Open Access shall be governed by a Creative Commons licence – details of these licences and which [Creative Commons](#) licence will apply to this Work are set out in our licence referred to above.

Other than as permitted in any relevant BMJ Author's Self Archiving Policies, I confirm this Work has not been accepted for publication elsewhere, is not being considered for publication elsewhere and does not duplicate material already published. I confirm all authors consent to publication of this Work and authorise the granting of this licence.

## 1 Fighting the hidden pandemic of antimicrobial resistance in pediatrics: 2 recommendations from the International Pediatric Association

3  
4 Zoi Dorothea Pana ZD<sup>1</sup>, Mortada El-Shabrawi<sup>2</sup>, Sultan, Muhammad Ashraf Sultan<sup>3</sup>, Thomas Murray T<sup>4</sup>, Anggraini  
5 Alam<sup>5</sup>, Yewale Vijay<sup>6</sup>, Dhanya Dharmapalan<sup>7</sup>, Jonathan D. Klein<sup>8</sup>, Joseph Haddad<sup>9</sup>, Naveen Thacker<sup>10</sup>, Aman B  
6 Pulungan<sup>11</sup>, Adamos Hadjipanayis<sup>12</sup>

- 7 1. Medical School, European University of Cyprus (EUC), Nicosia, Cyprus.
- 8 2. Department of Pediatrics, Cairo University, Cairo, Egypt. Standing Committee Member of the IPA (2019-  
9 2023), Co-Chair of the IPA Strategic Advisory Group on: COVID-19, Antimicrobial Resistance, and  
10 Infectious Diseases, President of the International Society of Tropical Pediatrics (ISTP)
- 11 3. Member, Standing Committee International Pediatric Association (IPA), Member, Standing Committee  
12 Asia Pacific Pediatric Association (APPA), Editor in Chief, Asia Pacific Journal of Pediatrics and Child  
13 Health, Member NITAG EPI Pakistan, Co-Chair of the IPA Strategic Advisory Group on: COVID-19,  
14 Antimicrobial Resistance, and Infectious Diseases
- 15 4. Department of Pediatrics, Infectious Disease and Global Health and Department of Laboratory Medicine,  
16 Yale School of Medicine, Connecticut, USA. Member of the IPA Strategic Advisory Group on: COVID-  
17 19, Antimicrobial Resistance, and Infectious Diseases
- 18 5. Medical School, Universitas Padjadjaran, Bandung, Indonesia, Member of the IPA Strategic Advisory  
19 Group on: COVID-19, Antimicrobial Resistance, and Infectious Diseases
- 20 6. Institute of Child Health, Apollo Hospitals, Navi Mumbai, India. Local Indian Coordinator the IPA  
21 Strategic Advisory Group on: COVID-19, Antimicrobial Resistance, and Infectious Diseases
- 22 7. Institute of Child Health, Apollo Hospitals, Navi Mumbai. IPA Strategic Advisory Group on: COVID-19,  
23 Antimicrobial Resistance, and Infectious Diseases
- 24 8. Department of Pediatrics University of Illinois at Chicago, Illinois, United States. International Pediatric  
25 Association.
- 26 9. Professor in Pediatrics and Neonatology, President of the Union of Arab Pediatric Societies (UAPS) (2017-  
27 2022), President of Union of Mediterranean and Middle East Pediatric Societies (UMEMPS) (2013-2017),  
28 President of the Lebanese Pediatric Society (2012-2014, 2018-2020), President Elect IPA
- 29 10. MD Ped. \*President International Pediatrics Association \*\* Director, Deep Children Hospital and  
30 Research Centre, Plot 208, Sector 1 -A Gandhidham Kutch Gujarat, India
- 31 11. Department of Child Health, Faculty of Medicine, University of Indonesia, Jakarta. Executive director of  
32 the IPA; Professor Pediatrics, Faculty of Medicine, Universitas Indonesia
- 33 12. Medical School, European University Cyprus, Nicosia, Cyprus, Scientific Coordinator of the IPA

34  
35  
36  
37  
38  
39 **Corresponding author:** Zoi Dorothea Pana, MD, MSc, PhD, Medical School, European University of Cyprus  
40 EUC, Nicosia, Cyprus, email: z.pana@euc.ac.cy, phone: +35794049474

41  
42  
43 **Keywords:** antimicrobial resistance, AMR, antibiotic prescription, pediatrics, infection prevention, public  
44 health, IPA

45  
46 **Conflict of interest:** None

47 **Funding statement:** Nothing to declare

48 **Contributorship statement:** All authors contributed to the design drafting and review of the manuscript.

49  
50 **Word count:** 1172

51 **Summary box:** IPA strongly recommends:

- 52 • early switch from broad spectrum empiric to narrower spectrum definitive antimicrobial therapy
- 53 • complete documentation for antibiotic prescription in the patient's medical charts
- 54 • to invest in paediatric-specific elements for the development of antifectives
- 55 • to enhance high-level scientific and political engagement, financial resources and technical expertise for  
56 tackling AMR

1  
2  
3 55**4 56 The impact of antimicrobial resistance in pediatrics**

57 The “masked” or the “silent” pandemic of antimicrobial resistance (AMR) is one of the biggest emerging  
58 threats to global health. The global burden of resistant infections during the neonatal and pediatric period  
59 is currently alarming. According to a recent report, infections attributed to multi drug resistant (MDR)  
60 bacteria may account for up to 30% of the total cases [1], while in specific areas, like in Middle East region,  
61 almost 90% of sepsis during the neonatal period in neonatal intensive care units (NICUs) were associated  
62 with resistant bacteria [2]. In the sub-Saharan Africa region, a recent meta- analysis in neonates showed  
63 that resistance to WHO recommended  $\beta$ -lactams was observed in 68% [3]. Several pediatric related issues  
64 have been identified, among others, the lack of pediatric antibiotic drug development, the limited pediatric  
65 clinical studies and therefore the lack of pediatric specific data, the limited drug options to treat MRD  
66 pediatric infections and finally the mis- or over-use of antibiotics. The 2016 ARPEC study reported a list  
67 of quality indicators to enhance the appropriate and prudent pediatric antimicrobial use[4]. The WHO report  
68 has identified for the first-time priorities for research and development of age-appropriate antibiotics in  
69 children. In response to the WHO global action plan to optimize the use of antimicrobial drugs both in  
70 adults and pediatrics, WHO has prepared and launched the updated WHO Model List of Essential  
71 Medicines (EML). The latter includes a pediatric section aiming to increase literacy and awareness related  
72 to the epidemiology, common infectious agents, diagnostic strategies and the impact of AMR. Most  
73 importantly, the EML-C includes guidance on antibiotic prescribing for the empiric treatment of common  
74 infections in children.

34 75

**36 76 The need to support initiatives related to infection control, infection prevention and antimicrobial  
37 77 stewardship in pediatrics**

39 78 A concerted, massive global awareness campaign targeting all health care workers, the regulatory  
40 79 authorities as well as the public is urgently needed to combat this AMR pandemic. This is one face of the  
41 80 coin. The second face of the coin being another concerted, massive global campaign in expanding infection  
42 81 prevention strategies, including the vaccination coverage in both developed and developing countries. As  
43 82 a result of vaccination, antibiotic usage will reduce selection pressure that favors resistant organisms.

47 83 One key aspect of AMR and hospital acquired infections (HAIs) associated with AMR is that through  
48 84 specific actions, these infections can be prevented (preventable harm and waste). It is estimated that up to  
49 85 60-70% of HAIs are considered avoidable through the improvement of infection prevention, infection  
50 86 control and antimicrobial stewardship multimodal strategies. Infections can be prevented by implementing  
51 87 a series of measures (known as bundles). The implementation of infection control and prevention strategies  
52 88 in pediatric health care remains worldwide a critical quality safety indicator that improves patient outcomes

89 and reduce preventable harm in children, such as the incidence of pediatric infections due to AMR in both  
90 inpatient and outpatient settings.

91 Strict legislation and monitoring regarding the over-the-counter availability of antibiotics is also an  
92 important infection control pillar in combatting AMR. Unfortunately, acquisition of antibiotics without  
93 prescriptions is a global phenomenon. Even in Sweden, a country with very strong legislation and regulation  
94 of antibiotics, a recent survey showed that 2.3% of the respondents had acquired antibiotics without  
95 prescription [5]. This will require careful attention to access to healthcare so children who require  
96 antibiotics can secure an appropriate drug at the correct dose for the ideal length of time after evaluation by  
97 a healthcare provider. An important point is to establish the early diagnosis of the infection, demanding the  
98 adequate taking of samples, the request for cultures and the use of molecular tools that identify the etiology  
99 and avoid the inappropriate administration of antibiotics.

100 Key components of pediatric infection prevention and control programs both at the national and local levels  
101 are the establishment of staff education and training; use of evidence-based guidelines; surveillance,  
102 monitoring, audit and feedback regarding antibiotic use in antimicrobial stewardship programs; workload  
103 and staffing; and rigorous maintenance of environmental hygiene. Of importance, priorities should be  
104 addressed both at a global and national level in governance, planning, regulatory and legal frameworks with  
105 close coordination and collaboration among key stakeholders in the public and private sectors to decrease  
106 the risk of AMR in pediatrics.

107 Another important aspect is the investment in the development of antiseptics and anti-infectives for the  
108 pediatric population. A major barrier to effective antimicrobial therapy is shortages of key antibiotics (such  
109 as amoxicillin). The supply of antibiotics must not be left to the market but requires additionally targeted  
110 transnational support from governments, NGOs, and philanthropy. All new and existing drugs need  
111 evidence-based dosage regimens from clinical studies for all age-groups (modelling and simulation will be  
112 useful to supplement carefully designed clinical studies) and formulations that are appropriate for all age  
113 groups in all climatic settings. Drug development of antibiotics in pediatrics should be driven by  
114 pharmaceutical policy that ensures that children's needs are included in the development of novel  
115 approaches such as the "subscription model".

116

## 117 **Recommendations**

118

119 The International Pediatric Association position against antimicrobial resistance in pediatrics:

120

- 121 1. to the pediatricians and IPA member societies globally to use all indicators related with the prompt  
122 discontinuation or de-escalation of antibiotics according to microbial culture results, the early

- 1  
2  
3 123 switch from broad spectrum empiric to narrower spectrum definitive antimicrobial therapy in  
4 124 children when possible.  
5  
6 125 2. to the pharmaceutical industry to increase their efforts in development of new effective  
7 126 antimicrobial agents and to provide sufficient amounts of appropriate antibiotics in pediatric  
8 127 formulations (the current shortage frequently urges pediatricians to use inappropriate broad-  
9 128 spectrum treatment).  
10  
11 129 3. to the pediatricians and IPA member societies globally to perform the complete documentation for  
12 130 antibiotic prescription in the patient's medical charts.  
13  
14 131 4. to the pediatricians and IPA member societies globally that the choice of antibiotic, dose, route of  
15 132 administration and duration of treatment for common infectious syndromes in pediatrics should be  
16 133 in alignment with the recommendations for antibiotics included in the WHO Model List of  
17 134 Essential Medicines in children<sup>13</sup> and Essential Medicines for Children and the WHO AWaRe.  
18  
19 135 5. action by multiple stakeholders for rational pharmaceutical policy that addresses AMR. This needs  
20 136 to include reliable global supply of key antibiotics, development of dosage regimens and dosage  
21 137 forms that are appropriate for children, and the inclusion of paediatric-specific elements in  
22 138 incentives and drivers for the development of antifectives.  
23  
24 139 6. IPA supports any initiative driven by any global or national agency that fosters public and  
25 140 healthcare provider awareness and literacy, prioritizing the need to advocate with local, national  
26 141 and international governments for legislation to reduce OTC antibiotics.  
27  
28 142 7. IPA supports the need for pediatric specific research and more accurate and accessible diagnostics  
29 143 to avoid antibiotic overuse.  
30  
31 144 8. IPA will collaborate together with global stakeholders, agencies and organizations to enhance  
32 145 public awareness and most importantly leverage high-level scientific and political engagement,  
33 146 financial resources and technical expertise, adapting to country-level needs and demands for  
34 147 tackling AMR with focus on the pediatric population.  
35  
36  
37  
38  
39  
40  
41  
42  
43  
44  
45  
46  
47  
48  
49  
50  
51  
52  
53  
54  
55  
56  
57  
58  
59  
60

154 **References**

1. Cassini A, Högberg LD, Plachouras D, et al. Attributable deaths and disability-adjusted life-years caused by infections with antibiotic-resistant bacteria in the EU and the European Economic Area in 2015: A population-level modelling analysis. *Lancet Infect. Dis.* 2019, 19, 56–66.
2. Al Jarousha AM, El Jadba AH, Al Afifi AS, et al. Nosocomial multidrug-resistant *Acinetobacter baumannii* in the neonatal intensive care unit in Gaza City, Palestine. *Int. J. Infect. Dis.* 2009, 13, 623–628.
3. Okomo U, Akpalu ENK, Le Doare K, et al. Aetiology of invasive bacterial infection and antimicrobial resistance in neonates in sub-Saharan Africa: A systematic review and meta-analysis in line with the STROBE-NI reporting guidelines. *Lancet Infect. Dis.* 2019, 19, 1219–1234.
4. Versporten A, Bielicki J, Drapier N, Sharland M, Goossens H; ARPEC project group. *J Antimicrob Chemother.* 2016 Apr;71(4):1106-17. doi: 10.1093/jac/dkv418.
5. Munthe C, Malmqvist E, Rönnerstrand B. Non-prescription acquisition of antibiotics: Prevalence, motives, pathways and explanatory factors in the Swedish population. *PLoS One.* 2022;17(9):e0273117.
