# Supplementary material for: Fighting the hidden pandemic of antimicrobial resistance in paediatrics: recommendations from the International Pediatric Association
Source: PubMed Central journal article supplement — BMJ Paediatr Open. 2023 Jul 27;7(1):e002084. doi: 10.1136/bmjpo-2023-002084 (PMC10387713; doi:10.1136/bmjpo-2023-002084), 2023-07-27
Supplement: bmjpo-2023-002084.reviewer_comments.pdf [file bmjpo-2023-002084.reviewer_comments.pdf]

## PEER REVIEW HISTORY

BMJ Paediatrics Open publishes all reviews undertaken for accepted manuscripts. Reviewers are asked to complete a checklist review form and are provided with free text boxes to elaborate on their assessment. These free text comments are reproduced below.

### ARTICLE DETAILS

|                            |                                                                                                                                                                                                                                             |
|----------------------------|---------------------------------------------------------------------------------------------------------------------------------------------------------------------------------------------------------------------------------------------|
| <b>TITLE (PROVISIONAL)</b> | Fighting the hidden pandemic of antimicrobial resistance in pediatrics: recommendations from the International Pediatric Association                                                                                                        |
| <b>AUTHORS</b>             | Pana, Zoi<br>El-Shabrawi, Mortada<br>Sultan, Muhammad Ashraf<br>Murray, Thomas<br>Alam, Anggraini<br>Yewale, Vijay<br>Dharmapalan, Dhanya<br>Klein, Jonathan<br>Haddad, Joseph<br>Thacker, Naveen<br>Pulungan, Aman<br>Hadjipanayis, Adamos |

### VERSION 1 - REVIEW

|                        |                                                              |
|------------------------|--------------------------------------------------------------|
| <b>REVIEWER</b>        | Dr. Carlos Franco-Paredes<br>UCH - Infectious Disease Clinic |
| <b>REVIEW RETURNED</b> | 01-Jun-2023                                                  |

|                         |                                                         |
|-------------------------|---------------------------------------------------------|
| <b>GENERAL COMMENTS</b> | This is a well written manuscript of utmost importance. |
|-------------------------|---------------------------------------------------------|

|                        |                                                                                             |
|------------------------|---------------------------------------------------------------------------------------------|
| <b>REVIEWER</b>        | Dr. Manuel Renato Retamozo-Palacios<br>Hospital Regional de Taguatinga, Infectious Diseases |
| <b>REVIEW RETURNED</b> | 02-Jun-2023                                                                                 |

|                         |             |
|-------------------------|-------------|
| <b>GENERAL COMMENTS</b> | No comments |
|-------------------------|-------------|

|                        |                                                                                    |
|------------------------|------------------------------------------------------------------------------------|
| <b>REVIEWER</b>        | Dr. Silvio Vega<br>Universidad de Panama Facultad de Medicina, Clinical Laboratory |
| <b>REVIEW RETURNED</b> | 05-Jun-2023                                                                        |

|                         |                                                                                                                                                                                                                                                                                                                       |
|-------------------------|-----------------------------------------------------------------------------------------------------------------------------------------------------------------------------------------------------------------------------------------------------------------------------------------------------------------------|
| <b>GENERAL COMMENTS</b> | Please add the following coments at the line 103.<br>An important point is to establish the early diagnosis of the infection, demanding the adequate taking of samples, the request for cultures and the use of molecular tools that identify the etiology and avoid the inappropriate administration of antibiotics. |
|-------------------------|-----------------------------------------------------------------------------------------------------------------------------------------------------------------------------------------------------------------------------------------------------------------------------------------------------------------------|

### VERSION 1 – AUTHOR RESPONSE

Reviewer 1

This is a well written manuscript of utmost importance.

Answer: Dear Reviewer on behalf of the IPA Group we would like to sincerely thank you for your review and comment.

Reviewer 2

No comments

Answer: Dear Reviewer on behalf of the IPA Group we would like to sincerely thank you for your review and comment.

Reviewer 3

Comments to the Author

Please add the following comments at the line 103.

An important point is to establish the early diagnosis of the infection, demanding the adequate taking of samples, the request for cultures and the use of molecular tools that identify the etiology and avoid the inappropriate administration of antibiotics.

Answer: Dear Reviewer on behalf of the IPA Group we would like to sincerely thank you for your review and comment. We have incorporated the text in the revised manuscript as proposed.
